# Supplementary material for: Structural basis of genomic RNA (gRNA) dimerization and packaging determinants of mouse mammary tumor virus (MMTV)
Source: PubMed Central journal article supplement (PMC4264320; doi:10.1186/s12977-014-0096-6), 2014-11-14

# Additional File 2

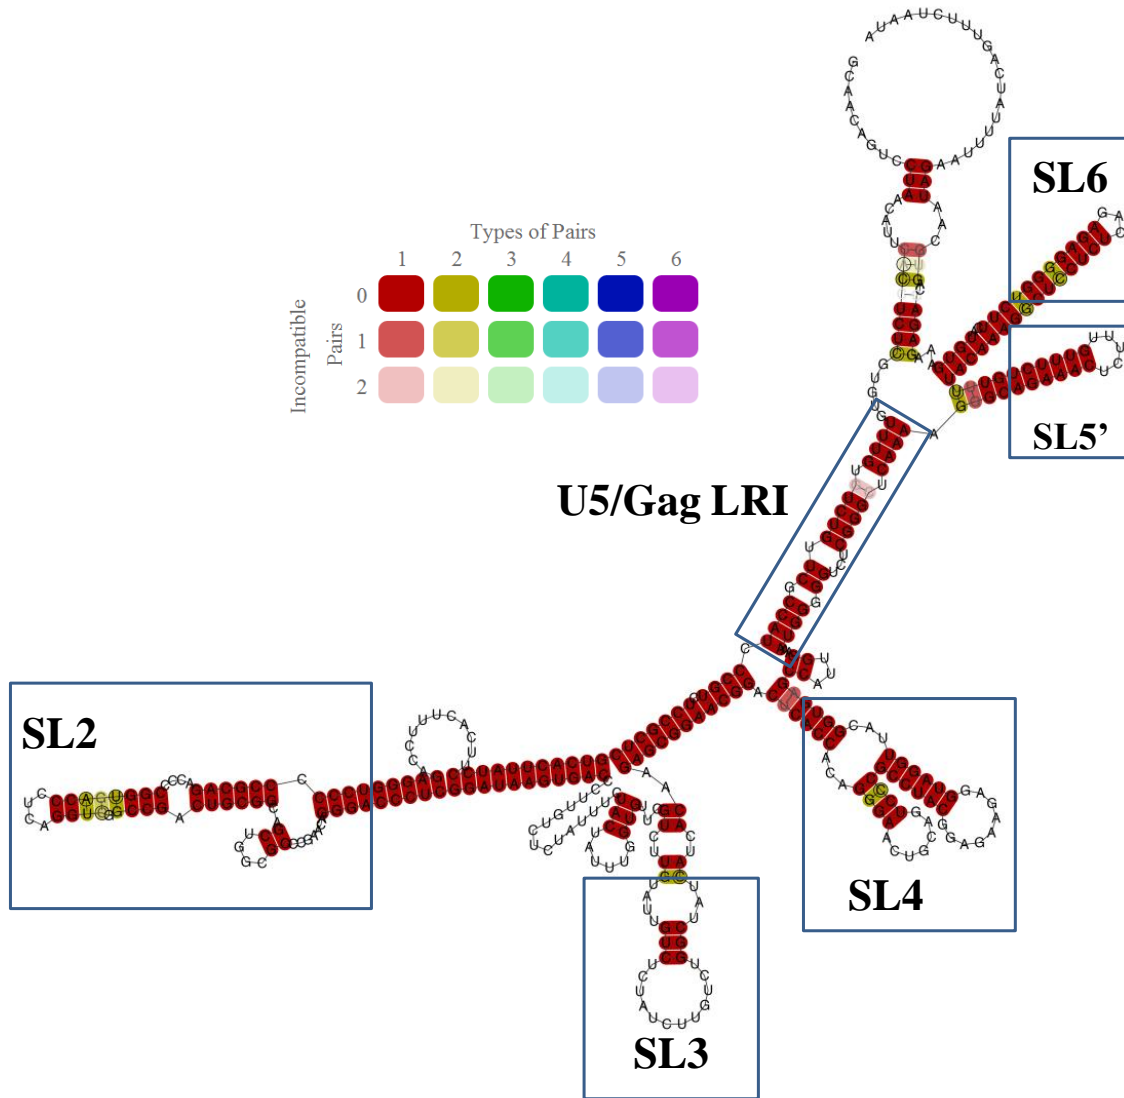

Supplement: 12977_2014_96_MOESM2_ESM.pdf [file 12977_2014_96_MOESM2_ESM.pdf]
