# Supplementary material for: Structural basis of genomic RNA (gRNA) dimerization and packaging determinants of mouse mammary tumor virus (MMTV)
Source: PubMed Central journal article supplement (PMC4264320; doi:10.1186/s12977-014-0096-6), 2014-11-14
Supplement: 12977_2014_96_MOESM4_ESM.pdf [file 12977_2014_96_MOESM4_ESM.pdf]

**Additional File 4. Description of primers used for cloning, sequencing, and conventional and real time PCR**

| Oligo Name | S/AS | Clone Name       | Sequence                                                 | Nucleotide Position (nt) | Virus & Gene (or plasmid) |
|------------|------|------------------|----------------------------------------------------------|--------------------------|---------------------------|
| OTR 984    | S    | SA035            | 5'ccaagcttAATACGACTCACTATAGGGCAACAGTC<br>CTAATATTCACG 3' | 1173-1193                | HYBMTV R (+1) start       |
| OTR 985    | AS   |                  | 5'aaaccgggTTCCCCTGGTCCCATAAG 3'                          | 1867-1885                | HYBMTV gag                |
| OTR 922    | S    | SA031/<br>SA031P | 5'CCCCGCAGATGCGGCAGCTGGCGC 3'                            | 1264-1313                | HYBMTV U5 region          |
| OTR 923    | AS   |                  | 5' GCTGCCGCATCTGCGGGGGACCC 3'                            | 1258-1307                | HYBMTV U5 region          |
| OTR 924    | S    | SA032/<br>SA032P | 5' TTCGTGCGGCAGCTGGCGCCCG 3'                             | 1299-1322                | HYBMTV U5 region          |
| OTR 925    | AS   |                  | 5' GCCGCACGAATCTGCGGGGGACCCCTCTGGA 3'                    | 1304-1252                | HYBMTV U5 region          |
| OTR 926    | S    | SA033/<br>SA033P | 5' CCCCCGCAGCTGCGGCAGCTGGCGC 3'                          | 1260-1313                | HYBMTV U5 region          |
| OTR 927    | AS   |                  | 5' GCTGCCGCAGCTGCGGGGGACCCCTCTG 3'                       | 1307-1254                | HYBMTV U5 region          |
| OTR 986    | S    | SA041/<br>SA041P | 5' GTAATCCCGCTACGGAGAAGAGGTAG 3'                         | 1442-1464                | HYBMTV UTR region         |
| OTR 987    | AS   |                  | 5' GCGGGATTACTCCCTATGGTGAGTCCGTTCC 3'                    | 1434-1414                | HYBMTV UTR region         |
| OTR 988    | S    | SA042/<br>SA042P | 5' CACCATAGCCTACGGAGAAGAGGTAGG 3'                        | 1446-1465                | HYBMTV UTR region         |
| OTR 989    | AS   |                  | 5' GTAGGCTATGGTGAGTCCGTTCCGCTC 3'                        | 1430-1410                | HYBMTV UTR region         |
| OTR 992    | S    | SA044/<br>SA044P | 5' GACGCACTCCCGCTACGGAGAAGAGG 3'                         | 1442-1461                | HYBMTV UTR region         |
| OTR 993    | AS   |                  | 5' GCGGGAGTGCGTCTCCCTATGGTGAGTCCGTTCC<br>3'              | 1434-1414                | HYBMTV UTR region         |
| OTR 994    | S    | SA045/<br>SA045P | 5' GGTGCGTTCCCGCTACGGAGAAGAGG 3'                         | 1442-1461                | HYBMTV UTR region         |
| OTR 995    | AS   |                  | 5' GCGGGAACGCACCTCCCTATGGTGAGTCCGTTCC<br>3'              | 1434-1414                | HYBMTV UTR region         |
| OTR 1075   | S    | SA046/<br>SA046P | 5' CGACTGCGGCAACAGGGACCCTCGG 3'                          | 1315-1331                | HYBMTV UTR region         |
| OTR 1076   | AS   |                  | 5' CCTGTTCGCCGAGTCGGCCGACC 3'                            | 1303-1288                | HYBMTV UTR region         |
| OTR 1077   | S    | SA047/<br>SA047P | 5' AAGCGGCATCCCGCTACGGAGAAGAGG 3'                        | 1442-1461                | HYBMTV UTR region         |
| OTR 1078   | AS   |                  | 5'<br>GCGGGATGCGCGCTTCTCCCTATGGTGAGTCCGTTCC<br>3'        | 1435-1415                | HYBMTV UTR region         |
| OTR 1200   | S    | SA052            | 5'AAACGCACATCCCGCTACGGAGAAGAGG 3'                        | 1442-1461                | HYBMTV UTR region         |
| OTR 1201   | AS   |                  | 5'GCGGGATGTGCGTTTCTCCCTATGGTGAGTCCG<br>TTCC 3'           | 1433-1414                | HYBMTV UTR region         |
| OTR 1202   | S    | SA053            | 5'AAGTGCGTATCCCGCTACGGAGAAGAGG 3'                        | 1442-1461                | HYBMTV UTR region         |
| OTR 1203   | AS   |                  | 5'GCGGGATACGCACTTCTCCCTATGGTGAGTCCGTT<br>CC 3'           | 1433-1414                | HYBMTV UTR region         |
| OTR 1208   | S    | SA056            | 5'AAGCGGCACGAACAGGGACCCTCGG 3'                           | 1315-1331                | HYBMTV UTR region         |
| OTR 1209   | AS   |                  | 5'CCTGTTCGTGCGCGCTTCCGAGTCGGCCGACC 3'                    | 1303-1288                | HYBMTV UTR region         |

|                     |    |                                   |                                                   |           |                                    |
|---------------------|----|-----------------------------------|---------------------------------------------------|-----------|------------------------------------|
| OTR 1204            | S  | SA057                             | 5'AAACGCACACGAACAGGGACCCCTCGG 3'                  | 1315-1331 | HYBMTV UTR region                  |
| OTR 1205            | AS |                                   | 5'CCTGTTCGTGTGCGTTTCCGCAGTCGGCCGACC 3'            | 1303-1288 | HYBMTV UTR region                  |
| OTR 1206            | S  | SA058                             | 5'AAGTGCGTACGAACAGGGACCCCTCGG 3'                  | 1315-1331 | HYBMTV UTR region                  |
| OTR 1207            | AS |                                   | 5'CCTGTTCGTACGCACTTCCGCAGTCGGCCGACC 3'            | 1303-1288 | HYBMTV UTR region                  |
| OTR 1224            | S  | SA059                             | 5'AAGCGCCCACGAACAGGGACCCCTCGG 3'                  | 1315-1331 | HYBMTV UTR region                  |
| OTR 1225            | AS |                                   | 5'CCTGTTCGTGGGCGCTTCCGCAGTCGGCCGACC 3'            | 1303-1288 | HYBMTV UTR region                  |
| OTR 1226            | S  | SA060                             | 5'AAGGGCGCACGAACAGGGACCCCTCGG 3'                  | 1315-1331 | HYBMTV UTR region                  |
| OTR 1227            | AS |                                   | 5'CCTGTTCGTGCGCCCTTCCGCAGTCGGCCGACC 3'            | 1303-1288 | HYBMTV UTR region                  |
| OTR 1212            | S  | SA061                             | 5' GGTCTTCATGTGAAAGAGAG 3'                        | 1554-1573 | HYBMTV gag                         |
| OTR 1213            | AS |                                   | 5' CTCTTTCACATGAAGACCAGCCTTTGTAAAACAGAA ACAAAG 3' | 1540-1517 | HYBMTV gag                         |
| OTR 930             | S  | Used for sequencing               | 5' GCTTGTGTGTTGGAGGTCGCTGAG 3'                    | 90-113    | pcDNA3                             |
| OTR 725             | S  |                                   | 5' aaaaaagcggcgcCCCTCGGATAAGTGACCCTTGTC 3'        | 1325-1347 | HYBMTV UTR region                  |
| OTR 581             | AS | $\beta$ -actin                    | 5' GGCATGGGGGAGGGCATAACC 3'                       |           | Actin A. Spliced or unspliced mRNA |
| OTR 582             | S  | $\beta$ -actin                    | 5' CCAGTGGCTTCCCCAGTG 3'                          |           | Actin S-1. Unspliced mRNA          |
| OTR 671             | S  | For PCR following DNase treatment | 5' GTCCTAATATTCACGTCTCGTGTG 3'                    | 1179-1202 | HYBMTV R region                    |
| OTR 672             | AS | For PCR following DNase treatment | 5' CTG TTCGGGCGCCAGCTGCCGCAG 3'                   | 1321-1298 | HYBMTV PBS region                  |
| MTV-1LTR-SITEM1 FAM | -  | qPCR probe                        | 5'TCGCCATCCCGTCTCC 3'                             | 1214-1229 | HYBMTV U5 region                   |
| MTV-1LTR-SITEF      | S  | qPCR Forward primer               | 5'CGTCTCGTGTGTTTGTGTTTGTGTCTGT 3'                 | 1192-1213 | HYBMTV U5 region                   |
| MTV-1LTR-SITER      | AS | qPCR Reverse Primer               | 5'CCTCTGGAAAGTGAAGGATAAGTGA 3'                    | 1259-1235 | HYBMTV U5 region                   |

Underlined sequence: T7 promoter.

Sequence in lower case: artificial and restriction enzyme sequences that were introduced in the oligos.

\*S, sense; AS, antisense.

\*\*HYBMTV, MMTV molecular clone created by Shackleford and Varmus [70].
