# Supplementary material for: Structural basis of genomic RNA (gRNA) dimerization and packaging determinants of mouse mammary tumor virus (MMTV)
Source: PubMed Central journal article supplement (PMC4264320; doi:10.1186/s12977-014-0096-6), 2014-11-14
Supplement: 12977_2014_96_MOESM5_ESM.pdf [file 12977_2014_96_MOESM5_ESM.pdf]

**Additional File 5:** Normalized SHAPE reactivity data from at least 3-6 independent experiments.

| Nt no. | RNA seq | BzCN reactivity |
|--------|---------|-----------------|
| 1      | G       | -999            |
| 2      | C       | -999            |
| 3      | A       | -999            |
| 4      | A       | -999            |
| 5      | C       | -999            |
| 6      | A       | -999            |
| 7      | G       | -999            |
| 8      | U       | -999            |
| 9      | C       | -999            |
| 10     | C       | -999            |
| 11     | U       | 0.284965        |
| 12     | A       | 0.30384         |
| 13     | A       | 0.374618        |
| 14     | U       | 0.598795        |
| 15     | A       | 1.106763        |
| 16     | U       | 0.860522        |
| 17     | U       | 0.468574        |
| 18     | C       | 0               |
| 19     | A       | 0.080154        |
| 20     | C       | 0.043616        |
| 21     | G       | 0.541723        |
| 22     | U       | 1.596105        |
| 23     | C       | 0.523824        |
| 24     | U       | 1.915072        |
| 25     | C       | 0.537045        |
| 26     | G       | 0.183978        |
| 27     | U       | 0.041542        |
| 28     | G       | 0.025346        |
| 29     | U       | 0.042334        |
| 30     | G       | 0.131507        |
| 31     | U       | 0.053142        |
| 32     | U       | 0.192344        |
| 33     | U       | 0.132093        |
| 34     | G       | 0.338396        |
| 35     | U       | 1.088123        |
| 36     | G       | 0.231608        |

|    |   |          |
|----|---|----------|
| 37 | U | 0.044274 |
| 38 | C | 0.046582 |
| 39 | U | 0.033023 |
| 40 | G | 0.045187 |
| 41 | U | 0.068223 |
| 42 | U | 0.339979 |
| 43 | C | 0.363275 |
| 44 | G | 0.04309  |
| 45 | C | 0.08158  |
| 46 | C | 0.269493 |
| 47 | A | 0.947545 |
| 48 | U | 0.48476  |
| 49 | C | 0.146278 |
| 50 | C | 0.100549 |
| 51 | C | 0.111207 |
| 52 | G | 0.18634  |
| 53 | U | 0.25804  |
| 54 | C | 0.373532 |
| 55 | U | 0.111575 |
| 56 | C | 0.023287 |
| 57 | C | 0.02147  |
| 58 | G | 0.049451 |
| 59 | C | 0.045637 |
| 60 | U | 0.180133 |
| 61 | C | 0.302482 |
| 62 | G | 0.168699 |
| 63 | U | 0.141848 |
| 64 | C | 0.164461 |
| 65 | A | 0.165159 |
| 66 | C | 0.003774 |
| 67 | U | 0.170392 |
| 68 | U | 0.302176 |
| 69 | A | 0.264256 |
| 70 | U | 0.145866 |
| 71 | C | 0.073816 |
| 72 | C | 0.188853 |
| 73 | U | 0.74335  |
| 74 | U | 0.765415 |
| 75 | C | 0.458458 |
| 76 | A | 0.68438  |
| 77 | C | 0.318862 |
| 78 | U | 0.547803 |
| 79 | U | 0.597699 |

|     |   |          |
|-----|---|----------|
| 80  | U | 0.195019 |
| 81  | C | 0.015805 |
| 82  | C | 0.115825 |
| 83  | A | 0.279112 |
| 84  | G | 1.135396 |
| 85  | A | 0.135927 |
| 86  | G | 0.087179 |
| 87  | G | 0.03681  |
| 88  | G | 0.095094 |
| 89  | U | 0.05123  |
| 90  | C | 0.01639  |
| 91  | C | 0.070724 |
| 92  | C | 0.184247 |
| 93  | C | 0.055354 |
| 94  | C | 0.088033 |
| 95  | C | 0.142484 |
| 96  | G | 0.124226 |
| 97  | C | 0.238904 |
| 98  | A | 0.35033  |
| 99  | G | 0.62501  |
| 100 | A | 0.755467 |
| 101 | C | 0.096648 |
| 102 | C | 0.140551 |
| 103 | C | -999     |
| 104 | C | 0.133437 |
| 105 | G | 0.040354 |
| 106 | G | 0.136073 |
| 107 | U | 0.186143 |
| 108 | G | 0.046355 |
| 109 | A | 0.05508  |
| 110 | C | 0.034967 |
| 111 | C | 0.214967 |
| 112 | C | 0.506359 |
| 113 | U | 1.14652  |
| 114 | C | 0.879529 |
| 115 | A | 1.907796 |
| 116 | G | 0.165538 |
| 117 | G | 0.096755 |
| 118 | U | 0.132462 |
| 119 | C | 0.044327 |
| 120 | G | 0.59241  |
| 121 | G | 0.347825 |
| 122 | C | 0.031135 |

|     |   |          |
|-----|---|----------|
| 123 | C | 0.033952 |
| 124 | G | 0.340301 |
| 125 | A | 0.208174 |
| 126 | C | 0.077362 |
| 127 | U | 0.124261 |
| 128 | G | 0.124444 |
| 129 | C | 0.081912 |
| 130 | G | 0.073219 |
| 131 | G | 0.069411 |
| 132 | C | 0.048728 |
| 133 | A | 0.259639 |
| 134 | G | 0.394971 |
| 135 | C | 0.981856 |
| 136 | U | 0.446584 |
| 137 | G | 0.182419 |
| 138 | G | 0.418695 |
| 139 | C | 0.239696 |
| 140 | G | 0.175224 |
| 141 | C | 0.027418 |
| 142 | C | 0.114856 |
| 143 | C | 0.422388 |
| 144 | G | 0.559742 |
| 145 | A | 1.097897 |
| 146 | A | 0.870001 |
| 147 | C | 0.700993 |
| 148 | A | 0.551254 |
| 149 | G | 0.053104 |
| 150 | G | 0.05612  |
| 151 | G | 0.083136 |
| 152 | A | 0.17364  |
| 153 | C | -999     |
| 154 | C | -999     |
| 155 | C | -999     |
| 156 | U | 0.235599 |
| 157 | C | 0.233505 |
| 158 | G | 0.065587 |
| 159 | G | 0.057254 |
| 160 | A | 0.276932 |
| 161 | U | 0.457166 |
| 162 | A | 0.06286  |
| 163 | A | 0.032862 |
| 164 | G | 0.043947 |
| 165 | U | 0.17765  |

|     |   |          |
|-----|---|----------|
| 166 | G | 0.095339 |
| 167 | A | 0.204016 |
| 168 | C | 0.21478  |
| 169 | C | 0.131542 |
| 170 | C | 0.166307 |
| 171 | U | 0.336647 |
| 172 | U | 0.32875  |
| 173 | G | 0.71542  |
| 174 | U | 0.480194 |
| 175 | C | 0.087099 |
| 176 | U | 0.121883 |
| 177 | C | 0.128615 |
| 178 | U | 0.421845 |
| 179 | A | 0.236454 |
| 180 | U | 0.232347 |
| 181 | U | 0.33228  |
| 182 | U | 0.201789 |
| 183 | C | 0.254199 |
| 184 | U | 0.421595 |
| 185 | A | 0.278185 |
| 186 | C | 0.21766  |
| 187 | U | 0.560351 |
| 188 | A | 0.532074 |
| 189 | U | 0.22251  |
| 190 | U | 0.207384 |
| 191 | U | 0.314571 |
| 192 | G | 0.095631 |
| 193 | G | 0.330806 |
| 194 | U | 0.366171 |
| 195 | G | 0.495795 |
| 196 | U | 0.382108 |
| 197 | U | 0.478709 |
| 198 | U | 0.333684 |
| 199 | G | 0.276521 |
| 200 | U | 0.170637 |
| 201 | C | 0.164966 |
| 202 | U | 0.399223 |
| 203 | U | 0.321233 |
| 204 | G | 0.285345 |
| 205 | U | 0.367735 |
| 206 | A | 0.248367 |
| 207 | U | 0.355475 |
| 208 | U | 0.452699 |

|     |   |          |
|-----|---|----------|
| 209 | G | 0.686958 |
| 210 | U | 0.1688   |
| 211 | C | 0.150061 |
| 212 | U | 0.072372 |
| 213 | C | 0.069265 |
| 214 | U | 0.292765 |
| 215 | U | 0.318383 |
| 216 | U | 0.245206 |
| 217 | C | 0.093581 |
| 218 | U | 0.504522 |
| 219 | U | 0.296694 |
| 220 | G | 0.345326 |
| 221 | U | 0.228213 |
| 222 | C | 0.148485 |
| 223 | U | 0.204951 |
| 224 | G | 0.183051 |
| 225 | G | 0.03186  |
| 226 | C | 0.106517 |
| 227 | U | 0.446862 |
| 228 | A | 0.257258 |
| 229 | U | 0.164891 |
| 230 | C | 0.520905 |
| 231 | A | 0.55358  |
| 232 | U | 0.239523 |
| 233 | C | 0.550044 |
| 234 | A | 0.607877 |
| 235 | C | 0.840358 |
| 236 | A | 0.775564 |
| 237 | A | 0.639879 |
| 238 | G | 0.296998 |
| 239 | A | 0.234025 |
| 240 | G | 0.113424 |
| 241 | C | 0.139225 |
| 242 | G | 0.23025  |
| 243 | G | 0.202711 |
| 244 | A | 0.322454 |
| 245 | A | 0.289909 |
| 246 | C | 0.062584 |
| 247 | G | -999     |
| 248 | G | -999     |
| 249 | A | 0.806104 |
| 250 | C | 0.190316 |
| 251 | U | 0.217485 |

|     |   |          |
|-----|---|----------|
| 252 | C | 0.111816 |
| 253 | A | 0.112216 |
| 254 | C | 0.061862 |
| 255 | C | 0.184081 |
| 256 | A | 1.124839 |
| 257 | U | 0.722007 |
| 258 | A | 0.533839 |
| 259 | G | 0.250752 |
| 260 | G | 0.120762 |
| 261 | G | 0.218423 |
| 262 | A | 0.195615 |
| 263 | G | 0.205473 |
| 264 | C | 0.174125 |
| 265 | U | 0.387671 |
| 266 | G | 0.290372 |
| 267 | C | 0.78527  |
| 268 | A | 0.754735 |
| 269 | G | 0.353313 |
| 270 | U | 0.289098 |
| 271 | C | 0.160926 |
| 272 | C | 0.148276 |
| 273 | C | 0.084039 |
| 274 | G | 0.110905 |
| 275 | C | 0.307071 |
| 276 | C | 0.334201 |
| 277 | U | 0.295669 |
| 278 | A | 0.06084  |
| 279 | C | 0.108063 |
| 280 | G | 0.220021 |
| 281 | G | 0.780514 |
| 282 | A | 1.247749 |
| 283 | G | 0.845051 |
| 284 | A | 1.354653 |
| 285 | A | 1.382226 |
| 286 | G | 1.090855 |
| 287 | A | 0.881956 |
| 288 | G | 0.747197 |
| 289 | G | 0.139271 |
| 290 | U | 0.245262 |
| 291 | A | 0.031245 |
| 292 | G | 0.082617 |
| 293 | G | 0.240763 |
| 294 | U | 0.779868 |

|     |   |          |
|-----|---|----------|
| 295 | U | 0.597589 |
| 296 | A | 0.505625 |
| 297 | C | 0.239014 |
| 298 | G | 0.178263 |
| 299 | G | 0.06438  |
| 300 | U | 0.204746 |
| 301 | G | 0.12063  |
| 302 | A | 0.065894 |
| 303 | G | 0.075554 |
| 304 | C | 0.174238 |
| 305 | C | 0.563284 |
| 306 | A | 0.676458 |
| 307 | U | 0.552505 |
| 308 | U | 0.680604 |
| 309 | G | 0.447293 |
| 310 | G | 0.50253  |
| 311 | A | 0.427984 |
| 312 | A | 0.352168 |
| 313 | A | 0.39676  |
| 314 | U | 0.234197 |
| 315 | G | 0.086429 |
| 316 | G | 0        |
| 317 | G | 0.058677 |
| 318 | G | 0.147937 |
| 319 | G | 0.323339 |
| 320 | U | 0.309459 |
| 321 | C | 0.157266 |
| 322 | U | 0.138762 |
| 323 | C | 0.24083  |
| 324 | G | 0.306462 |
| 325 | G | 0.299193 |
| 326 | G | 0.193736 |
| 327 | C | 0.088351 |
| 328 | U | 0.446606 |
| 329 | C | 1.010401 |
| 330 | A | 0.484196 |
| 331 | A | 0.765479 |
| 332 | A | 0.678972 |
| 333 | A | 0.509723 |
| 334 | G | 0.185994 |
| 335 | G | 0.102755 |
| 336 | G | 0.139023 |
| 337 | C | 0.060567 |



|     |   |          |
|-----|---|----------|
| 338 | A | 0.115974 |
| 339 | G | 0.160287 |
| 340 | A | 0.213725 |
| 341 | A | 0.288594 |
| 342 | A | 0.177028 |
| 343 | C | 0.134095 |
| 344 | U | 0.457414 |
| 345 | C | 0.404796 |
| 346 | U | 0.58935  |
| 347 | U | 0.692395 |
| 348 | U | 0.630118 |
| 349 | G | 0.026645 |
| 350 | U | 0.141345 |
| 351 | U | 0.040344 |
| 352 | U | 0        |
| 353 | C | 0.025843 |
| 354 | U | 0.490221 |
| 355 | G | 0.700606 |
| 356 | U | 0.385538 |
| 357 | U | 0.350645 |
| 358 | U | 0.333142 |
| 359 | U | 0.320929 |
| 360 | A | 0.516689 |
| 361 | C | 0.87976  |
| 362 | A | 0.228858 |
| 363 | A | 0.193516 |
| 364 | A | 0.145364 |
| 365 | G | 0.033957 |
| 366 | G | 0.117133 |
| 367 | C | 0.084613 |
| 368 | U | 0.038526 |
| 369 | C | 0.026351 |
| 370 | C | 0.058223 |
| 371 | U | 0.080661 |
| 372 | C | 0.094581 |
| 373 | U | 0.362298 |
| 374 | C | 1.259264 |
| 375 | A | 1.737467 |
| 376 | G | 1.342181 |
| 377 | A | 1.306808 |
| 378 | G | 0.043065 |
| 379 | A | 0.023706 |
| 380 | G | 0        |

|     |   |          |
|-----|---|----------|
| 381 | G | -999     |
| 382 | G | 0        |
| 383 | G | -999     |
| 384 | U | 0        |
| 385 | C | -999     |
| 386 | U | 0.234021 |
| 387 | U | 0.745919 |
| 388 | C | 1.383041 |
| 389 | A | 0.813116 |
| 390 | U | 0.198127 |
| 391 | G | 0.082211 |
| 392 | U | 0.074206 |
| 393 | G | 0.076748 |
| 394 | A | 0.125872 |
| 395 | A | 0.25386  |
| 396 | A | 0.377037 |
| 397 | G | 0.275605 |
| 398 | A | 0.124367 |
| 399 | G | 0.134431 |
| 400 | A | 0.086701 |
| 401 | G | 0.109682 |
| 402 | U | 0.486064 |
| 403 | A | 0.197638 |
| 404 | G | 0.150322 |
| 405 | U | 0.274143 |
| 406 | G | 0.718776 |
| 407 | C | 1.4075   |
| 408 | A | 0.727748 |
| 409 | A | 0.510831 |
| 410 | U | 0.626919 |
| 411 | A | 0.47635  |
| 412 | G | 0.477619 |
| 413 | A | 0.500571 |
| 414 | A | 0.373856 |
| 415 | U | 0.359908 |
| 416 | U | 0.259863 |
| 417 | U | 0.501968 |
| 418 | U | 0.389608 |
| 419 | A | 0.30641  |
| 420 | U | 0.152996 |
| 421 | C | 0.981109 |
| 422 | A | 0.608906 |
| 423 | G | 0.403632 |

|     |   |          |
|-----|---|----------|
| 424 | U | 0.247558 |
| 425 | U | 0.340032 |
| 426 | U | 0.137758 |
| 427 | C | 0.158769 |
| 428 | U | 0.794397 |
| 429 | A | 0.181424 |
| 430 | A | 0.551719 |
| 431 | U | 0.795339 |
| 432 | A | 0.731406 |
